# Supplementary material
Source: PubMed Central journal article supplement (PMC3412429)
Supplement: NIHMS387951-supplement-Table.pdf [file NIHMS387951-supplement-Table.pdf]

| Patient number | Finger number    | Surgery number (and time since previous surgery) | Procedure number (for a particular finger) | Clinical impression of glomus tumor               | Abnormalities by MRI                                                                                                                                                                                                                                                               | Operative findings                                                   | Pathology findings                                                    |
|----------------|------------------|--------------------------------------------------|--------------------------------------------|---------------------------------------------------|------------------------------------------------------------------------------------------------------------------------------------------------------------------------------------------------------------------------------------------------------------------------------------|----------------------------------------------------------------------|-----------------------------------------------------------------------|
| NIH-1          | Left F4          | 1                                                | 1                                          | Yes                                               | 1) Nodular lesion, ulnar aspect: hyperintensity on T2 and prominent enhancement with gad; 2) Smaller lesion, more centrally situated within nail bed on T2; but difficult to see on post-contrast                                                                                  | 2 distinct tumors (subungual and in pulp, at tip, with bony erosion) | Glomus tumor (X2)                                                     |
| NIH-1          | Left F4          | 2 (+ 6 mo)                                       | 2                                          | Yes                                               | Limited study but 1) Residual tumor at ulnar side of nailbed with mild T2 hyperintensity and minimal enhancement with gad; 2) Small central nailbed finding with mild T2 hyperintensity, and minimal enhancement                                                                   | Tumor in pulp, with bony erosion                                     | Glomus tumor                                                          |
| NIH-1          | Left F4          | 3 (+ 6 mo)                                       | 3                                          | Yes                                               | None                                                                                                                                                                                                                                                                               | No tumor found                                                       | No specimen submitted                                                 |
| NIH-1          | Left F3          | 2 (+ 6 mo)                                       | 1                                          | Yes                                               | Abnormality central to ulnar aspect of nailbed with mild STIR and T2 hyperintensity                                                                                                                                                                                                | "Small abnormality found"                                            | Pacinian corpuscle                                                    |
| NIH-1          | Left F3          | 3 (+ 6 mo)                                       | 2                                          | Yes                                               | None                                                                                                                                                                                                                                                                               | "No abnormalities found"                                             | Dense fibrous tissue                                                  |
| NIH-1          | Left F5          | 1                                                | 1                                          | Yes                                               | Lesion with moderate enhancement with gad; poorly resolved on STIR and T2 due to poor fat suppression                                                                                                                                                                              | Tumor in pulp, no bony erosion                                       | Glomus tumor                                                          |
| NIH-1          | Left F5          | 3 (+ 12 mo)                                      | 2                                          | Yes                                               | None                                                                                                                                                                                                                                                                               | "No obvious glomus tumors"                                           | Traumatic neuroma                                                     |
| NIH-1          | Right F3         | 1                                                | 1                                          | Yes                                               | Approx. 3.5 mm palmar lesion with moderate enhancement with gad and mild to moderate hyperintensity on T2 and STIR; mild bone erosion                                                                                                                                              | Tumor in pulp, with bony erosion                                     | Glomus tumor                                                          |
| NIH-1          | Right F4         | 2                                                | 1                                          | Yes                                               | Mild focal increased enhancement at margins of nailbed, ulnar side > radial side, minimal hyperintensity on T2                                                                                                                                                                     | "Some areas of whitish tumor"                                        | Pacinian corpuscle                                                    |
| NIH-1          | Right F5         | 2                                                | 1                                          | Yes                                               | None                                                                                                                                                                                                                                                                               | "Some areas of whitish tumor"                                        | Pacinian corpuscle                                                    |
| NIH-2          | Left F2          | 1                                                | 1                                          | Yes                                               | Nodular lesion, isointense on T1 and mildly hyperintense on T2; moderate enhancement with gad; smooth erosion of the underlying phalangeal cortex                                                                                                                                  | "Tumor"                                                              | Glomus tumor                                                          |
| NIH-2          | Left F2          | 2 (+ 8 mo)                                       | 2                                          | Yes                                               | No change from earlier imaging. Nodular lesion at ulnar side of nailbed shows marked T2 hyperintensity and gad enhancement with erosion of the underlying cortex. No marrow edema. There is also thickening and increased gad enhancement at radial side of nailbed more distally. | Tumor "scalloped the bone somewhat"                                  | Glomus tumor                                                          |
| NIH-2          | Left F4          | 1                                                | 1                                          | Yes                                               | Nodular lesion, isointense to nail bed on T1 and minimally hyperintense on T2; moderate enhancement with gad; erosion of the underlying bony cortex                                                                                                                                | "Tumor"                                                              | Glomus tumor                                                          |
| NIH-2          | Left F4          | 2 (+ 8 mo)                                       | 2                                          | Yes                                               | Thick lumpy nailbed with bone erosion; moderate T2 hyperintensity, mild increased enhancement with gad                                                                                                                                                                             | "Tumor"                                                              | Glomus tumor                                                          |
| NIH-2          | Right F1 (thumb) | 1                                                | 1                                          | Yes                                               | T2 images demonstrate a bi-lobed lesion; post-contrast imaging demonstrates subcortical, intraosseous component; generalized enhancement in nailbed                                                                                                                                | "Tumor"                                                              | Glomus tumor                                                          |
| NIH-2          | Right F1 (thumb) | 2 (+ 8 mo)                                       | 2                                          | Yes                                               | Irregular lumpy nailbed. More focally prominent at ulnar side of nailbed with bone erosion; mild gad enhancement and mild T2 hyperintensity                                                                                                                                        | "Tumor"                                                              | Glomus tumor                                                          |
| NIH-2          | Right F1 (thumb) | 3 (+ 8 mo)                                       | 3                                          | Yes                                               | Post-operative changes only                                                                                                                                                                                                                                                        | "Scar tissue"                                                        | No specimen submitted                                                 |
| NIH-2          | Left F3          | 2                                                | 1                                          | Yes                                               | None                                                                                                                                                                                                                                                                               | "Tumor"                                                              | Dense fibrous tissue                                                  |
| NIH-2          | Right F4         | 3                                                | 1                                          | Yes                                               | Focal nodular lesion, axial T2 with increased enhancement                                                                                                                                                                                                                          | "Tumor easily identified"                                            | Glomus tumor                                                          |
| NIH-2          | Right F5         | 3                                                | 1                                          | Yes                                               | Localized widening at both ulnar and radial margins of the nailbed with mild increased enhancement but without T2 hyperintensity. T2 showed small punctate focal hyperintensity in central nailbed without gad correlate                                                           | "No tumor identified"                                                | No specimen submitted                                                 |
| NIH-3          | Left F3          | 1                                                | 1                                          | Yes                                               | T2 imaging depicts a nodular high signal lesion; also a mildly increased signal on T1. No substantial enhancement relative to surrounding nail bed on post contrast imaging                                                                                                        | "Apparent abnormality"                                               | Glomus tumor                                                          |
| NIH-3          | Right F4         | 1                                                | 1                                          | Yes                                               | No MRI imaging performed                                                                                                                                                                                                                                                           | "2 small nodular approx 1 mm lesions"                                | Fibrovascular tissue                                                  |
| NIH-3          | Left F4          | 1                                                | 1                                          | Yes                                               | None                                                                                                                                                                                                                                                                               | "Found no abnormalities"                                             | No specimen submitted                                                 |
| NIH-4          | Left F3          | 1                                                | 1                                          | Yes                                               | Nodular lesion, best seen on T2 and STIR; exhibits only mild increased enhancement                                                                                                                                                                                                 | "Tumor"                                                              | Glomus tumor                                                          |
| Leu-1          | Right F4         | 1                                                | 1                                          | Yes, and reddish discoloration of nail bed        | No MRI imaging performed                                                                                                                                                                                                                                                           | Tumor proximal in nail bed                                           | Glomus tumor                                                          |
| Leu-1          | Right F5         | 1                                                | 1                                          | Yes                                               | No MRI imaging performed                                                                                                                                                                                                                                                           | Tumor under nail plate, removed via "window" in nail                 | Glomus tumor                                                          |
| Leu-2          | Right F3         | 1                                                | 1                                          | Yes                                               | No MRI imaging performed                                                                                                                                                                                                                                                           | Tumor in nail bed                                                    | Glomus tumor                                                          |
| Leu-2          | Right F4         | 1                                                | 1                                          | Yes, reddish discoloration at base of phalanx     | No MRI imaging performed                                                                                                                                                                                                                                                           | Tumor in nail bed                                                    | Glomus tumor, surrounded by Schwann cells without connection to axons |
| Leu-3          | Left F3          | 1                                                | 1                                          | Yes                                               | No MRI imaging performed                                                                                                                                                                                                                                                           | Tumor in distal pulpa                                                | Glomus tumor                                                          |
| Leu-3          | Right F4         | 1                                                | 1                                          | Yes                                               | No MRI imaging performed                                                                                                                                                                                                                                                           | Tumor in distal pulpa                                                | Glomus tumor                                                          |
| Leu-3          | Left F4          | 2 (after 6y)                                     | 1                                          | Yes, with split nail                              | No MRI imaging performed                                                                                                                                                                                                                                                           | 1 tumor ulnar side and 1 tumor nail bed                              | Glomus tumor x 2                                                      |
| Leu-4          | Right F4         | 1                                                | 1                                          | Yes, mild swelling radial side of base of phalanx | No MRI imaging performed                                                                                                                                                                                                                                                           | 1 tumor radial side under nail plate                                 | Glomus tumor                                                          |

|           |                    |           |   |                                                          |                                                                             |                                              |              |
|-----------|--------------------|-----------|---|----------------------------------------------------------|-----------------------------------------------------------------------------|----------------------------------------------|--------------|
| Leu-5     | Left F3            | 1         | 1 | Yes, mild swelling and reddish color radial side phalanx | No MRI imaging performed                                                    | 1 tumor at radial side distal phalanx        | Glomus tumor |
| Leu-5     | Left F3            | 2 (+ 13m) | 2 | Yes                                                      | Normal MRI, hypoechogenic lesion ultrasound 2.5x2.2 mm                      | 1 tumor at same location as previous surgery | Glomus tumor |
| Leu-6     | Right F3           | 1         | 1 | Yes                                                      | No MRI imaging performed                                                    | Tumor under nail plate on ulnar side         | Glomus tumor |
| Leu-7     | Left F5            | 1         | 1 | Yes, large tumor in pulpa with red color of skin         | No MRI imaging performed                                                    | Large tumor in pulpa                         | Glomus tumor |
| Leu-8     | Left F4            | 1         | 1 | Yes, swelling proximal phalanx and deformed nail         | No MRI imaging performed                                                    | Tumor radial side of nailbed                 | Glomus tumor |
| Hamburg-1 | Left F4            | 1         | 1 | Yes                                                      | Discrete 2 mm lesion on T1 post-contrast enhancement with fat suppression   | Tumor in pulp, no bony erosion               | Glomus tumor |
| Hamburg-2 | Right T1 (big toe) | 1         | 1 | Yes                                                      | Semi-circular signal intensity subungual, right T1, no contrast enhancement | Tumor in pulp, no bony erosion               | Glomus tumor |

**Table S1. Chronology, clinical impression, MRI imaging, operative findings and pathology results of 14 individuals with NF1-associated glomus tumors. Note that NIH-5 not listed since surgery and imaging performed at another institution. T2 = T2-weight imaging by MRI; STIR = short T1 Inversion recovery imaging sequence by MRI; Gad = gadolinium contrast agent**
